# Supplementary material for: Passport Officers’ Errors in Face Matching
Source: PLoS One. 2014 Aug 18;9(8):e103510. doi: 10.1371/journal.pone.0103510 (PMC4136722; doi:10.1371/journal.pone.0103510)
Supplement: Performance Data S1 — Performance data for individual study participants. (XLSX) [file pone.0103510.s001.xlsx]

## Sheet: photo-to-person
Participant ID	match	mismatch	overall
p01	100	83.3333	91.6667
p02	100	100	100
p03	100	93.3333	96.6667
p04	93.75	92.8571	93.3036
p05	100	100	100
p06	100	100	100
p07	93.75	77.7778	85.7639
p08	100	81.8182	90.9091
p09	100	70.5882	85.2941
p10	81.25	93.75	87.5
p11	87.5	100	93.75
p12	92.8571	92.8571	92.8571
p13	100	72.7273	86.3636
p14	100	72.7273	86.3636
p15	76.9231	100	88.4615
p16	100	46.6667	73.3333
p17	100	100	100
p18	100	50	75
p19	85.7143	87.5	86.6071
p20	100	100	100
p21	75	71.4286	73.2143
p23	87.5	52.6316	70.0658
p24	83.3333	100	91.6667
p25	100	85	92.5
p26	88.2353	83.3333	85.7843
p27	84.6154	77.7778	81.1966
p28	100	93.3333	96.6667
p29	100	100	100
p31	90.4762	92.8571	91.6667
p32	100	100	100

## Sheet: photo-to-photo
ACCURACY		PHOTO-ID		2-Year Old Photo			RESPONSE TIME		PHOTO-ID		2-Year Old Photo
Participant ID	Group	match	mismatch	match	mismatch		Participant ID	Group	match	mismatch	match	mismatch
p01	Passport Officer	85.7143	95.2381	85.7143	95.2381		p01	Passport Officer	4877	4389	5524	4790
p03	Passport Officer	66.6667	95.2381	80.9524	95.2381		p03	Passport Officer	3860	3953	6903	3112
p05	Passport Officer	95.2381	76.1905	100	66.6667		p05	Passport Officer	7376	4212	5387	3356
p13	Passport Officer	66.6667	100	42.8571	76.1905		p13	Passport Officer	3438	4074	4043	3602
p14	Passport Officer	66.6667	95.2381	85.7143	100		p14	Passport Officer	7441	7171	6405	6084
p17	Passport Officer	52.381	95.2381	61.9048	100		p17	Passport Officer	14047	8414	11693	5951
p20	Passport Officer	90.4762	90.4762	76.1905	90.4762		p20	Passport Officer	5953	6671	6529	4500
p24	Passport Officer	76.1905	57.1429	85.7143	57.1429		p24	Passport Officer	5102	6882	4511	3939
p29	Passport Officer	52.381	95.2381	52.381	100		p29	Passport Officer	8439	8300	10321	15231
p30	Passport Officer	76.1905	95.2381	66.6667	90.4762		p30	Passport Officer	3569	4269	2625	7295
p33	Passport Officer	90.4762	71.4286	90.4762	80.9524		p33	Passport Officer	2729	2191	2194	2247
p34	Passport Officer	66.6667	100	76.1905	85.7143		p34	Passport Officer	4595	5096	5626	2682
p35	Passport Officer	61.9048	71.4286	61.9048	76.1905		p35	Passport Officer	4956	3248	4001	3996
p36	Passport Officer	76.1905	85.7143	80.9524	90.4762		p36	Passport Officer	9874	9923	8387	8312
p37	Passport Officer	80.9524	100	71.4286	95.2381		p37	Passport Officer	6099	4642	4417	4140
p38	Passport Officer	71.4286	71.4286	85.7143	71.4286		p38	Passport Officer	10465	10091	16726	7879
p39	Passport Officer	76.1905	95.2381	76.1905	95.2381		p39	Passport Officer	3593	5490	3296	3071
p40	Passport Officer	80.9524	76.1905	57.1429	76.1905		p40	Passport Officer	5331	3385	6613	2720
p41	Passport Officer	71.4286	100	71.4286	100		p41	Passport Officer	27246	10171	27480	11186
p42	Passport Officer	90.4762	90.4762	71.4286	90.4762		p42	Passport Officer	13439	12184	16397	10014
p43	Passport Officer	71.4286	80.9524	47.619	90.4762		p43	Passport Officer	13493	13395	12464	12322
p44	Passport Officer	80.9524	100	61.9048	100		p44	Passport Officer	8572	5884	18733	5097
p45	Passport Officer	90.4762	71.4286	100	66.6667		p45	Passport Officer	7678	12553	9248	12099
p46	Passport Officer	47.619	90.4762	90.4762	90.4762		p46	Passport Officer	9685	8040	8249	5270
p47	Passport Officer	76.1905	95.2381	71.4286	100		p47	Passport Officer	5330	3266	5555	2852
p48	Passport Officer	28.5714	100	42.8571	100		p48	Passport Officer	13583	3461	11582	3701
p49	Passport Officer	76.1905	95.2381	71.4286	90.4762		p49	Passport Officer	12427	7631	6571	6614
c01	Conrol	61.9	95.2	76.2	85.7		c01	Conrol	4308	4248	7811	3185
c02	Conrol	47.6	71.4	61.9	90.5		c02	Conrol	1577	1682	1508	1558
c03	Conrol	57.1	95.2	57.1	100		c03	Conrol	2081	1869	1925	1501
c04	Conrol	76.2	71.4	90.5	81		c04	Conrol	2239	3892	2622	3459
c05	Conrol	81	76.2	90.5	66.7		c05	Conrol	1747	2068	1876	1784
c06	Conrol	66.7	100	81	100		c06	Conrol	11138	6651	9235	4973
c07	Conrol	66.7	90.5	81	100		c07	Conrol	2645	2332	3878	2718
c08	Conrol	57.1	90.5	71.4	100		c08	Conrol	4504	2820	3821	2188
c09	Conrol	38.1	100	66.7	95.2		c09	Conrol	5689	3207	5437	2425
c10	Conrol	57.1	85.7	47.6	76.2		c10	Conrol	1776	1581	1732	1648
c11	Conrol	61.9	100	71.4	95.2		c11	Conrol	4405	2454	3589	3198
c12	Conrol	47.6	95.2	52.4	100		c12	Conrol	1697	1805	1734	1492
c13	Conrol	66.7	76.2	52.4	95.2		c13	Conrol	2145	3083	2477	2095
c14	Conrol	33.3	95.2	38.1	95.2		c14	Conrol	2627	3065	2664	3147
c15	Conrol	47.6	100	61.9	95.2		c15	Conrol	7074	2174	3717	1922
c16	Conrol	71.4	95.2	81	85.7		c16	Conrol	2132	2769	2604	3302
c17	Conrol	66.7	95.2	71.4	100		c17	Conrol	4843	5456	6717	3860
c18	Conrol	71.4	81	66.7	85.7		c18	Conrol	2124	2060	2597	2775
c19	Conrol	90.5	76.2	81	76.2		c19	Conrol	4263	4594	3349	4335
c20	Conrol	81	95.2	81	90.5		c20	Conrol	4133	3447	4397	2477
c21	Conrol	66.7	66.7	85.7	76.2		c21	Conrol	2149	2251	2755	2073
c22	Conrol	66.7	85.7	76.2	85.7		c22	Conrol	4713	6820	6961	4162
c23	Conrol	76.2	95.2	76.2	100		c23	Conrol	2196	2101	2414	2012
c24	Conrol	66.7	85.7	76.2	85.7		c24	Conrol	2438	2382	3022	2754
c25	Conrol	85.7	76.2	81	95.2		c25	Conrol	4506	6625	5308	5964
c26	Conrol	76.2	95.2	71.4	95.2		c26	Conrol	1833	1881	1984	1712
c27	Conrol	76.2	90.5	81	100		c27	Conrol	7996	3869	6052	2862
c28	Conrol	90.5	61.9	100	66.7		c28	Conrol	5519	6975	5735	6458
c29	Conrol	33.3	95.2	61.9	100		c29	Conrol	11521	6598	13891	4729
c30	Conrol	66.7	95.2	90.5	90.5		c30	Conrol	2519	1807	2272	1889
c31	Conrol	42.9	100	61.9	100		c31	Conrol	7955	2979	4865	1584
c32	Conrol	66.7	100	66.7	100		c32	Conrol	8101	5896	8837	5534
c33	Conrol	90.5	61.9	100	66.7		c33	Conrol	5519	6975	5735	6458
c34	Conrol	81	76.2	81	71.4		c34	Conrol	6209	6889	2252	2898
c35	Conrol	81	85.7	81	95.2		c35	Conrol	5539	2677	5269	3564
c36	Conrol	66.7	90.5	95.2	90.5		c36	Conrol	9476	4028	9166	2729
c37	Conrol	28.6	100	33.3	100		c37	Conrol	2682	1743	3893	1685
c38	Conrol	71.4	85.7	81	95.2		c38	Conrol	1965	2287	2581	2050
		68.4303	88.0535	73.0472	89.2281
		70.7387	88.6408

## Sheet: gfmt
Participant ID	match	mismatch	overall
p01	90	70	80
p02	65	80	72.5
p03	75	70	72.5
p04	85	75	80
p05	80	45	62.5
p06	75	90	82.5
p07	100	85	92.5
p08	65	65	65
p09	95	80	87.5
p10	90	85	87.5
p11	85	90	87.5
p12	85	80	82.5
p13	60	75	67.5
p14	95	85	90
p15	80	90	85
p16	55	60	57.5
p17	100	90	95
p18	90	55	72.5
p19	80	80	80
p20	65	100	82.5
p21	75	100	87.5
p22	65	65	65
p23	85	65	75
p24	85	95	90
p25	95	90	92.5
p26	90	70	80
p27	70	50	60
p28	55	90	72.5
p29	85	75	80
p30	100	80	90
	80.6667	77.6667	79.1667
